# Supplementary material for: Coproduction of a Theory-Based Digital Resource for Unpaid Carers (The Care Companion): Mixed-Methods Study
Source: PubMed Central journal article supplement (PMC6716079; doi:10.2196/aging.9025), 2018-02-28
Supplement: aging_v1i1e1_app1.pdf [file aging_v1i1e1_app1.pdf]

## Appendix 1 – Key Words used in literature search

| <b>Who</b>                  | <b>Why</b>                 | <b>How</b>                             | <b>What</b>                |
|-----------------------------|----------------------------|----------------------------------------|----------------------------|
| Elderly                     | Health condition           | Technological innovation               | Health care                |
| Frail elderly               | Long-term health condition | Technological intervention             | Integrated care            |
| Aged                        | Age-related disease        | Smart technology                       | Social care                |
| Ageing                      | Chronic illness            | Information & Communication Technology | Social support             |
| Ageing                      | Chronic disease            | Technology Enhanced Care               | Social network             |
| Cared-for                   | Chronic disease            | Service                                | Social media               |
| Older person                | Physical disability        | Telehealth                             | Informal support           |
| Older person requiring care | Learning difficulty        | Telecare                               | Informal support networks  |
| Older adults                | Mental health problem      | Tele coaching                          | Forum                      |
| Older people                | Life expectancy            | Digital care                           | Discussion board           |
| Older population            | Hospital admissions        | Digital health service                 | Online discussion          |
| Oldest old                  | Needs                      | Internet-based                         | Support group              |
| Carer                       | Unmet needs                | MHealth                                | Voluntary groups           |
| Informal carer              | Caregiver strain           | Handheld computer                      | Social agencies            |
| Hidden carer                | Burden of care             | Mini computer                          | Self-assessment            |
| Spousal carer               | Quality of life            | Tablet                                 | Self-help                  |
| Unpaid carer                | Stress                     | Personal Data Assistant (PDA)          | Health-based information   |
| Family carer                | Self-efficacy              | Smartphone                             | Health promotion           |
| Family caregiver            | Self-esteem                | Mobile phone                           | Health literacy            |
| Family member               | Mental health              | Android phone                          | Legal information          |
| Relative                    | Social isolation           | Mobile device                          | Financial Information      |
| Close relative              | Wellbeing                  | Mobile application                     | Signpost                   |
|                             | Loneliness                 | Mobile phone application               | Online education programme |
|                             | General health             | Mobile health application              | Training                   |
|                             | Health impact              | Smartphone application                 | Digital Inclusion          |
|                             | Hostility                  | Self-care app                          | Digital capability         |
|                             |                            | Health app                             | Social participation       |
|                             |                            | Medical app                            | Social engagement          |
|                             |                            | Smartphone-based intervention          | Empowerment                |
|                             |                            | Mobile health intervention             | Ownership                  |

|  |  |  |                     |
|--|--|--|---------------------|
|  |  |  | <b>Independence</b> |
|--|--|--|---------------------|
